# Supplementary material
Source: Springer Nature journal article supplement (https://www.springermedizin.de/resource/supplementary/12891_2013_2121_MOESM6_ESM.docx/9509460)
Supplement: MOESM6 [file 9509460]

|  | **ICRS Score** | **Defect Size** | **OCD grading** |
| --- | --- | --- | --- |
| **Previous operation*** |  |  |  |
| corr.-coefficient | 0.3804 | 0.3042 | 0.3789 |
| valid cases | 28 | 20 | 28 |
| significance (P) | 0.0229 | n.s. | 0.0234 |
| **Duration of complains** |  |  |  |
| corr.-coefficient | 0.0773 | -0.0992 | 0.2444 |
| valid cases | 28 | 20 | 28 |
| significance (P) | n.s. | n.s. | n.s. |
| **Age** |  |  |  |
| corr.-coefficient | 0.3039 | 0.1256 | 0.4018 |
| valid cases | 28 | 20 | 28 |
| significance (P) | n.s. | n.s. | 0.0170 |
| **BMI** |  |  |  |
| corr.-coefficient | 0.1547 | -0.2090 | 0.2778 |
| valid cases | 28 | 20 | 28 |
| significance (P) | n.s. | n.s. | n.s. |
| **FFI** |  |  |  |
| corr.-coefficient | 0.4669 | 0.2016 | 0.5232 |
| valid cases | 28 | 20 | 28 |
| significance (P) | 0.0061 | n.s. | 0.0021 |
| **CFSS** |  |  |  |
| corr.-coefficient | -0.3626 | -0.1845 | -0.4936 |
| valid cases | 28 | 20 | 28 |
| significance (P) | 0.0289 | n.s. | 0.0038 |
| **AOFAS** |  |  |  |
| corr.-coefficient | -0.2734 | 0.0065 | -0.4588 |
| valid cases | 28 | 20 | 28 |
| significance (P) | n.s. | n.s. | 0.0070 |
| **KLS** |  |  |  |
| corr.-coefficient | 0.3954 | -0.0256 | 0.5119 |
| valid cases | 28 | 20 | 28 |
| significance (P) | 0.0186 | n.s. | 0.0027 |
| **AOSS** |  |  |  |
| corr.-coefficient | 0.4035 | 0.4125 | 0.3846 |
| valid cases | 25 | 17 | 25 |
| significance (P) | 0.0227 | 0.0499 | 0.0288 |

**Table 3:** Correlation of items characterizing an OCD lesion with regard to the accompanying cartilage lesion in the ankle with epidemiological data, function and radiological parameters. ICRS Score characterizes degree of cartilage damage. Defect size was only reported for type 3 or 4 lesions (full thickness defects). OCD grading is reported according to Berndt and Harty; BMI: body mass index, FFI: foot function index, CFSS: calcaneal fractures scoring system according to Kerr, AOFAS: ankle-hindfoot scale, KLS: Kellgren Lawrence Score, AOSS: ankle osteoarthritis scoring system, corr.-coefficient: correlation coefficient Spearman’s ρ, *****U-test.
